# Supplementary material
Source: PubMed Central journal article supplement (PMC1805628)

Raw data are reproduced for each experiment. For dTDP-xylose, recalculating  $K_a$  with  $N$  fixed to be 1 gives a value of  $1.3 \times 10^3 M$ .

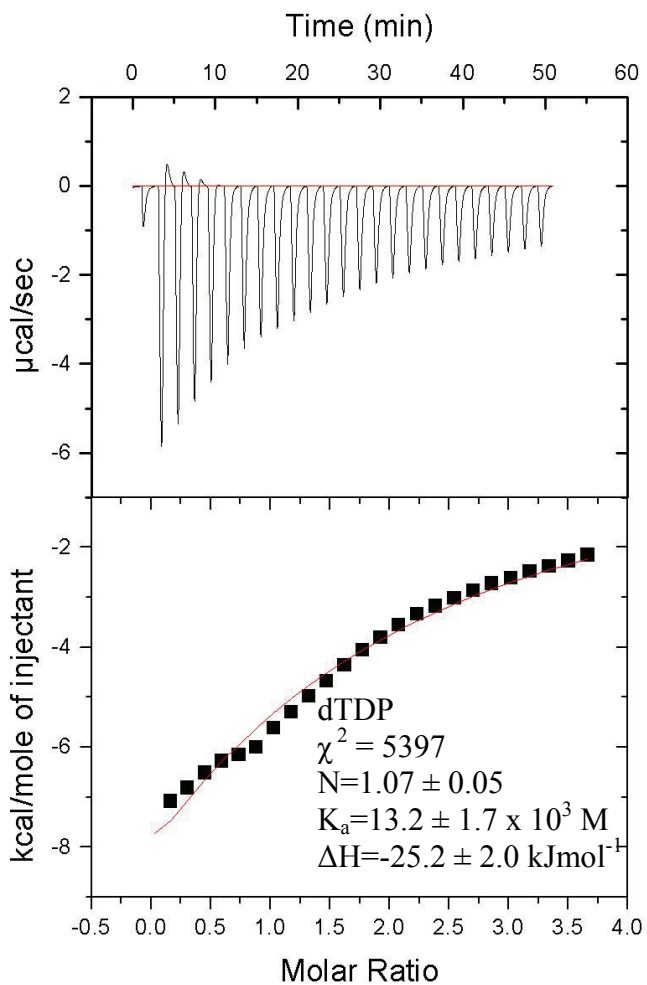

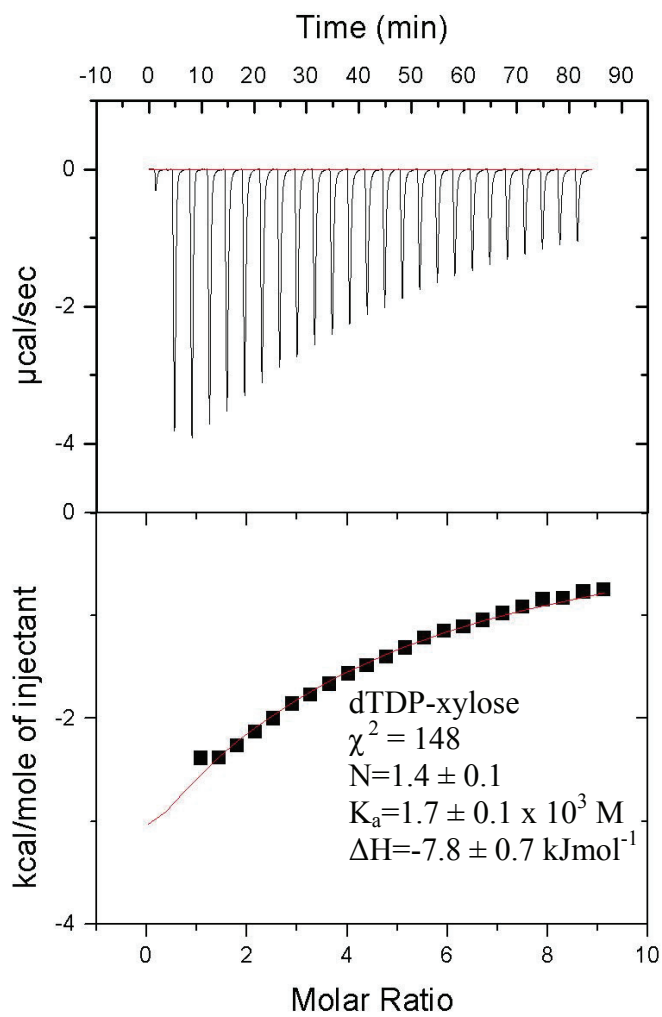

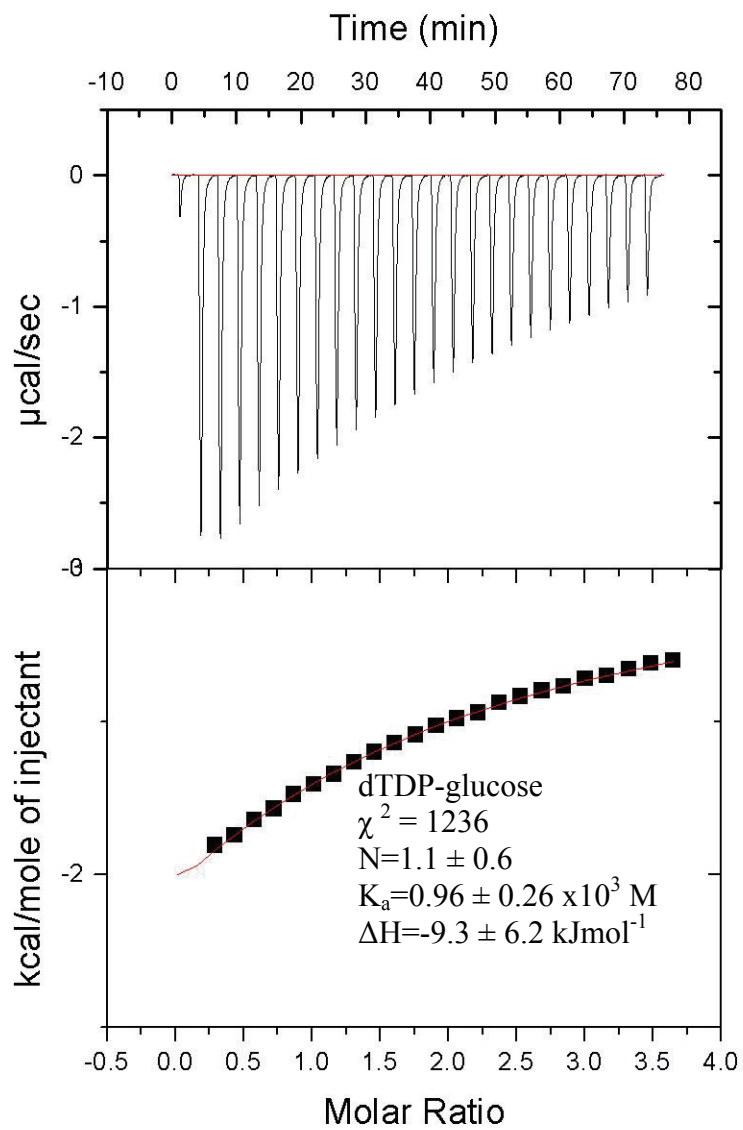

Supplement: NIHMS14916-supplement-01.pdf [file NIHMS14916-supplement-01.pdf]
